# Supplementary material
Source: Springer Nature journal article supplement (https://www.springermedizin.de/resource/supplementary/13063_2009_373_MOESM5_ESM.pdf/9618092)
Supplement: MOESM5 [file 9618092]

## Senegal

24 hospitals, 536 trained professionals  
50,144 patients expected per year

## Mali

22 hospitals, 531 trained professionals  
46,797 patients expected per year

*Stratified selection*

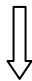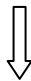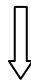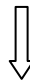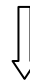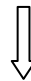

6 hospitals  
in Dakar\*

10 regional  
hospitals°

8 district  
hospitals°

6 hospitals in  
Bamako\*

4 regional  
hospitals°

12 district  
hospitals°

*Random<sup>+</sup>  
allocation*

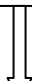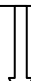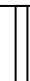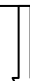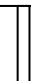

3 intervention  
hospitals

3 control  
hospitals

4 intervention  
hospitals

4 control  
hospitals

2 intervention  
hospitals

2 control  
hospitals

5 intervention  
hospitals

5 control  
hospitals

3 intervention  
hospitals

3 control  
hospitals

6 intervention  
hospitals

6 control  
hospitals
